# Supplementary material
Source: PubMed Central journal article supplement (PMC5317236)
Supplement: DC151988SupplementaryData.pdf [file DC151988SupplementaryData.pdf]

**Phase 3 Trial of Transplantation of Human Islets in Type 1 Diabetes**

**Complicated by Severe Hypoglycemia**

**Supplementary Materials**

|                                                                                                                                                                                                   |           |
|---------------------------------------------------------------------------------------------------------------------------------------------------------------------------------------------------|-----------|
| <b>Supplementary Appendix S1. The CIT Consortium.....</b>                                                                                                                                         | <b>2</b>  |
| <b>Supplementary Appendix S2. Primary and Secondary Endpoint Definitions.....</b>                                                                                                                 | <b>3</b>  |
| <b>Supplementary Appendix S3. Quantitative scores of Clarke score, hypoglycemia severity (HYPO score) and glycemic lability index (LI) and Mean Amplitude of Glycemic Excursions (MAGE) .....</b> | <b>4</b>  |
| <b>Supplementary Appendix S4. CONSORT Diagram.....</b>                                                                                                                                            | <b>5</b>  |
| <b>Supplementary Appendix S5. Definition of Reduced Awareness of Hypoglycemia, Lability and Qualification for the Study Based on the Elements of the Definition .....</b>                         | <b>7</b>  |
| <b>Supplementary Appendix S6. CIT Questionnaire Documenting Severe Hypoglycemia (completed by each patient’s treating physician) .....</b>                                                        | <b>8</b>  |
| <b>Supplementary Appendix S7. Standardized Lot Release Criteria Interim Certificate of Analysis Fields.....</b>                                                                                   | <b>9</b>  |
| <b>Supplementary Appendix S8. Study Treatment Regimen .....</b>                                                                                                                                   | <b>11</b> |
| <b>Supplementary Appendix S9. Patient Listings for Primary Endpoint and Secondary Endpoint Components in Y1 .....</b>                                                                             | <b>13</b> |
| <b>Supplementary Appendix S10. Reasons for Failure to Meet Primary Endpoint (HbA1C&lt;7%, and no SHE* between days 28 and 365 following first transplant). .....</b>                              | <b>15</b> |
| <b>Supplementary Appendix S11. Supplementary Figure 1 Containing CGMS Data.....</b>                                                                                                               | <b>16</b> |
| <b>Supplementary Appendix S12. Patient Disposition Table Through Y2.....</b>                                                                                                                      | <b>20</b> |
| <b>Supplementary Appendix S13. Reasons for Failure to Complete 2 Years of Follow-Up in CIT-07 .....</b>                                                                                           | <b>24</b> |
| <b>Supplementary Appendix S14. Serious Adverse Event Listing.....</b>                                                                                                                             | <b>25</b> |
| <b>Supplementary Appendix S15. Serious Adverse Event Descriptions.....</b>                                                                                                                        | <b>27</b> |

**Supplementary Appendix S1. The CIT Consortium**

**Emory University:** Beth Begley, Jose Cano, Sallie Carpentier, Jennifer Hutchinson, Johanna Moreno, Marti Sears, Dasia Webster

**Northwestern University:** Patrice Al-saden, Xioajuan Chen, Angela Hecyk, Mark Molitch, Natalie Monson, Elyse Stuart, Amisha Wallia, Lingjia Wang, Shusen Wang, Xiaomin Zhang

**NIAID:** Allison Priore, Elizabeth Schneider

**NIDDK:** Neal Green

**University of Alberta, Edmonton:** David L. Bigam, Patricia Campbell, Parastoo Dinyari, Tatsuya Kin, Norman M. Kneteman, James Lyon, Andrew Malcolm, Doug O’Gorman, Chris Onderka, Richard Owen, Rena Pawlick, Brad Richer, Shawn Rosichuk, Donna Sarman, Adam Schroeder, Peter A. Senior, Lana Toth, Vali Toth, Wendy Zhai

**University of California, San Francisco:** Kristina Johnson, Joan McElroy, Marissa Ramos, Tara Rojas, Gregory Szot

**University of Illinois, Chicago:** Barbara Barbaro, Joan Martellotto, Meirigeng Qi, Yong Wang

**University of Iowa (Data Coordinating Center):** Levent Bayman, Joseph S. Dillon, Cynthia Diltz, Gregory C. Doelle, Dixie Ecklund, Deb Feddersen, Eric Foster, Carol Jasperson, David-Erick Lafontant, Tina Neill-Hudson, Deb Nollen, Julie Qidwai, Holly Riss, Traci Schwieger, Jamie Willits, Jon Yankey

**University of Miami:** Andrea Curry Corrales, Raquel Faradji, Tatiana Froud, Ana Alvarez Gil, Eva Herrada, Luca Inverardi, Norma Kenyon, Aisha Khan, Elina Linetsky, Eduardo Peixoto

**University of Minnesota:** Muhamad H. Abdulla, A. N. Balamurugan, Mary Brandenburg, James V. Harmon, Raja Kandaswamy, Gopal Loganathan, Kate Mueller, Klearchos K. Papas, Jayne Pedersen, Joshua J. Wilhelm, Jean Witson

**University of Pennsylvania:** Cornelia Dalton-Bakes, Hongxing Fu, Malek Kamoun, Jane Kearns, Yanjing Li, Chengyang Liu, Eline Luning-Prak, Yanping Luo, Eileen Markmann, Zaw Min, Maral Palanjian, Richard Shlansky-Goldberg, Kumar Vivek, Amin Sam Ziaie

## Supplementary Appendix S2. Primary and Secondary Endpoint Definitions

**Primary Endpoint:** The proportion of patients with an HbA1c <7.0% at Day 365 AND free of severe hypoglycemic events from Day 28 to Day 365 inclusive following the first islet transplant, with the day of transplant designated Day 0.

**Severe hypoglycemic event (SHE):** An event with one of the following symptoms: memory loss; confusion; uncontrollable behavior; irrational behavior; unusual difficulty in awakening; suspected seizure; seizure; loss of consciousness; or visual symptoms, in which the patient was unable to treat him/herself and which was associated with either a blood glucose level <54 mg/dL (3.0 mmol/L) or prompt recovery after oral carbohydrate, IV glucose, or glucagon administration.

**Insulin Independence:** Islet transplant recipients will be considered insulin-independent with full islet graft function if they are able to titrate off insulin therapy for at least 1 week and all of the following criteria are met:

- One HbA1c level, one fasting serum glucose level, and a Mixed Meal Tolerance Test are documented within the visit window (e.g. 70-80 days at Day 75) and 7 consecutive days of blood sugar and insulin readings are documented within +/- 7 days of the visit window (e.g. 63 – 87 days at Day 75);
- HbA1c <7.0% or a  $\geq 2.5\%$  decrease from baseline;
- Fasting capillary glucose level should not exceed 140 mg/dL (7.8 mmol/L) more than three times in the 7 consecutive days (fasting is defined as 1st blood sugar reading of the day not noted as post-prandial or bedtime);
- Post-prandial serum glucose  $\leq 180$  mg/dL (10.0 mmol/L) at 90 minutes during the MMTT;
- Fasting serum glucose level  $\leq 126$  mg/dL (7.0 mmol/L): if the fasting serum glucose level is >126 mg/dL (7.0 mmol/L), it must be confirmed in an additional one out of two measurements;
- At least one MMTT fasting or stimulated c-peptide  $\geq 0.5$  ng/ml.

SUPPLEMENTARY DATA

**Supplementary Appendix S3. Quantitative scores of Clarke score, hypoglycemia severity (HYPO score) and glycemic lability index (LI) and Mean Amplitude of Glycemic Excursions (MAGE)**

| Measurement             | Description                                                                                                                                                                                                                                       | Reference Values                                                                                                                                                                 |
|-------------------------|---------------------------------------------------------------------------------------------------------------------------------------------------------------------------------------------------------------------------------------------------|----------------------------------------------------------------------------------------------------------------------------------------------------------------------------------|
| <b>Clarke Score (1)</b> | Patient response to questions on reduced awareness of hypoglycemia and presence or absence of autonomic and neuroglycopenic symptoms associated with low blood glucose in the past year.                                                          | Scored 0-8. >4 indicates reduced awareness; <2 indicates awareness of hypoglycemia; derived from a population of 78 T1D patients                                                 |
| <b>HYPO score (2)</b>   | Based on 4 week diary of at least 4 times daily Blood Glucose (BG) monitoring with points assigned for symptoms and assistance required with each BG reading <54 mg/dl and recall of severe hypoglycemic episodes (SHE) in the previous 12 months | ≥423 and ≥1047 represent the 75 <sup>th</sup> and 90 <sup>th</sup> percentile values derived from a population of 100 patients with T1D                                          |
| <b>LI (2)</b>           | Based on 4 week diary of at least 4 times daily BG monitoring calculated as the sum of all the squared differences in consecutive glucose readings divided by the time between consecutive readings                                               | ≥329 and ≥433 (mmol/l) <sup>2</sup> /h·wk <sup>-1</sup> represent the 75 <sup>th</sup> and 90 <sup>th</sup> percentile values derived from a population of 100 patients with T1D |
| <b>MAGE (2,3)</b>       | Based on 2 day diary of at least 7 times daily BG monitoring calculated as the mean of all glycemic excursions (peak minus nadir) >1 S.D. of the mean BG                                                                                          | 112-189 mg/dL <sup>1</sup> represents the 25 <sup>th</sup> to 75 <sup>th</sup> interquartile range derived from a population of 100 patients with T1D                            |

<sup>1</sup>To convert to mmol/l, divide by 0.05551.

References for this table:

1. Clarke, WL, Cox, DJ, Gonder-Frederick, LA, Julian, D, Schlundt, D, Polonsky, W. Reduced awareness of hypoglycemia in adults with IDDM. *Diabetes Care*, 1995. 18(4): 517-522.
2. Ryan E, Shandro T, Green K, Paty B, Senior P, Bigam D, et al. Assessment of the severity of hypoglycemia and glycemic lability in type 1 diabetic subjects undergoing islet transplantation. *Diabetes*. 2004 Apr; 53(4):955-62. 2
3. Service FJ, Molnar GD, Rosevear JW, Ackerman E, Gatewood LC, Taylor WF. Mean amplitude of glycemic excursions, a measure of diabetic instability. *Diabetes*. 1970 Sep; 19(9):644-655.

### **Supplementary Appendix S4. CONSORT Diagram**

Three hundred forty-one patients signed written informed consent to participate in a screening/baseline study. Seventy of these patients terminated their participation before completing the screening process. One hundred thirty-eight patients completed screening but were considered screen failures. One hundred thirty-three patients were screening eligible. They were placed on the waitlist to receive a compatible pancreas suitable for islet isolation. When a pancreas became available for a waitlisted patient, that patient was randomized to participate in Protocol CIT-07 or a CIT Phase 2 pilot study. Forty-eight patients were randomized to CIT-07. All 48 patients randomized to Protocol CIT-07 received one or more PHPI transplant(s). Forty-five patients remained enrolled in Protocol CIT-07 through evaluation of the primary end point at one year post-initial transplant; 3 were lost to follow-up. Forty-two of the 45 remaining patients achieved success on the primary end point.

SUPPLEMENTARY DATA

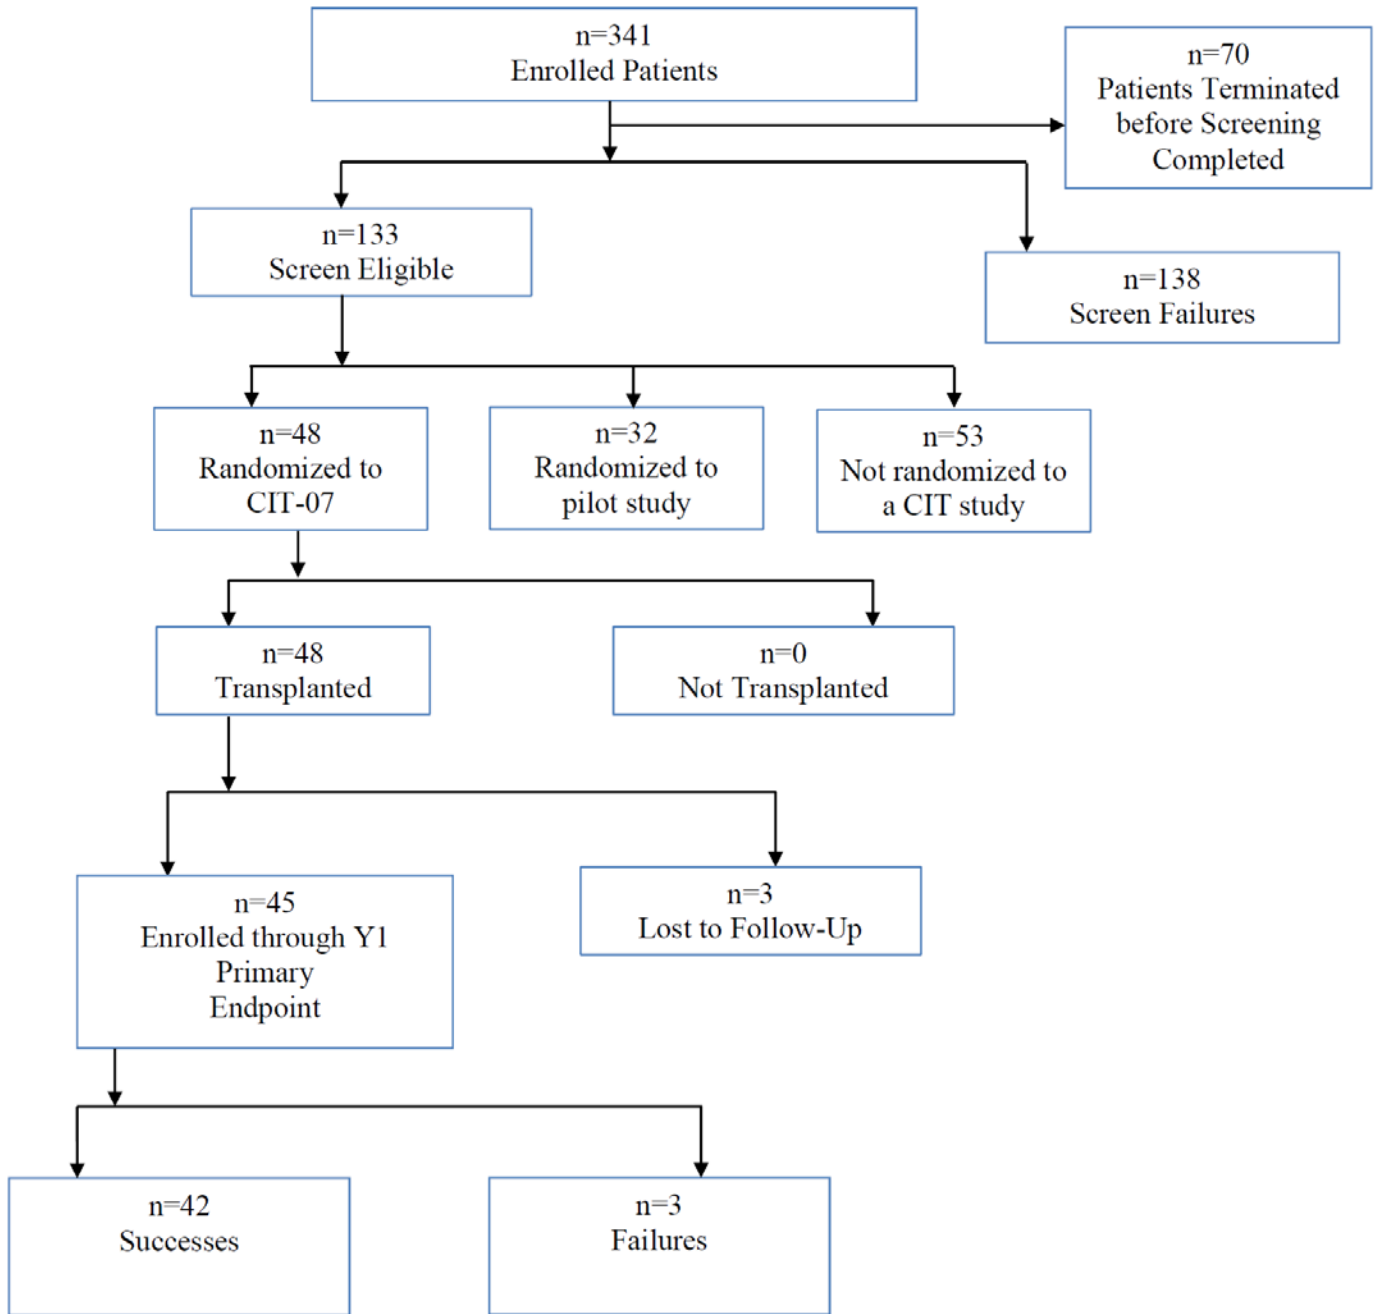

SUPPLEMENTARY DATA

**Supplementary Appendix S5. Definition of Reduced Awareness of Hypoglycemia, Lability and Qualification for the Study Based on the Elements of the Definition**

| Criteria for Study Entry                                                                                                                                                                                                                                                                     | Number (%) of Patients Qualifying Based on Criterion |
|----------------------------------------------------------------------------------------------------------------------------------------------------------------------------------------------------------------------------------------------------------------------------------------------|------------------------------------------------------|
| A Clarke score of 4 or more OR a HYPO score greater than or equal to the 90th percentile (1047) during the screening period and within the last 6 months prior to transplant                                                                                                                 | Clarke score: 47 (97.9%)<br>HYPO score: 30 (62.5%)   |
| Marked glycemic lability characterized by wide swings in blood glucose despite optimal diabetes therapy and defined by an LI score greater than or equal to the 90th percentile (433 mmol/L <sup>2</sup> /h-wk) during the screening period and within the last 6 months prior to transplant | 40 (83.3%)                                           |
| A composite of a Clarke score of 4 or more and a HYPO score greater than or equal to the 75th percentile (423) and a LI greater than or equal to the 75th percentile (329) during the screening period and within the last 6 months prior to transplant                                      | 28 (58.5%)                                           |

SUPPLEMENTARY DATA

**Supplementary Appendix S6. CIT Questionnaire Documenting Severe Hypoglycemia (completed by each patient's treating physician)**

1.) Did your patient have onset of Type I diabetes prior to age 40 years?

Yes \_\_\_\_\_

No \_\_\_\_\_

2.) Has your patient been insulin-dependent for more than 5 years?

Yes \_\_\_\_\_

No \_\_\_\_\_

3.) Has your patient been under the management of an endocrinologist, diabetologist, or other diabetes specialist for at least one year, with at least three clinical evaluations over this past year?

Yes \_\_\_\_\_

No \_\_\_\_\_

4.) Has your patient followed for at least one year a program of intensive diabetes management, including:

- a. Self monitoring of blood glucose at least three times daily on average, AND
- b. Administration of three or more injections of insulin daily on average or use of an insulin pump

Yes \_\_\_\_\_

No \_\_\_\_\_

5.) Has your patient been UNABLE to achieve glycemic control without hypoglycemic episodes (HbA1c >7%, or HbA1c <7% but with reduced awareness of hypoglycemia)?

Yes \_\_\_\_\_

No \_\_\_\_\_

6.) Has your patient had over the past six months either:

- a. Reduced hypoglycemic awareness (Clarke score  $\geq 4$  or HYPO score  $\geq 1047$ , OR
- b. Marked glycemic lability (Lability Index  $\geq 433$ ) with wide swings in blood glucose despite optimized diabetes therapy, OR
- c. The combination of a Clarke score  $\geq 4$  AND a HYPO score  $\geq 423$  AND a Lability Index  $\geq 329$  (see attached letter)?

Yes \_\_\_\_\_

No \_\_\_\_\_

7.) Has your patient had in the past year at least one severe hypoglycemic event (requiring assistance of another person, and with measured blood glucose <54 mg/dL [3.0 mmol/L] and/or prompt recovery after administration of carbohydrate or glucagon)?

Yes \_\_\_\_\_

No \_\_\_\_\_

Signed \_\_\_\_\_

Date \_\_\_\_\_



SUPPLEMENTARY DATA

**Supplementary Appendix S7. Standardized Lot Release Criteria Interim Certificate of Analysis Fields**

| <b>Test</b>                                               | <b>Requirement</b>                                                                                                                                                                                   |
|-----------------------------------------------------------|------------------------------------------------------------------------------------------------------------------------------------------------------------------------------------------------------|
| <b>Identity</b>                                           |                                                                                                                                                                                                      |
| Recipient Identity                                        | Recipient Study ID # and Recipient Medical Record Number on this CoA and on each infusion bag label are identical to that in the Production Batch Record, Section 12.3                               |
| Islets Identity                                           | Islets are present in each product bag                                                                                                                                                               |
| <b>Volumes in Bags</b>                                    |                                                                                                                                                                                                      |
| Suspension Volume                                         | 200 mL per product bag<br>≤600 mL total in three product bags                                                                                                                                        |
| Settled Tissue Volume                                     | ≤7.5 mL per product bag<br>≤15.0 mL total in three product bags                                                                                                                                      |
| <b>Potency</b>                                            |                                                                                                                                                                                                      |
| High Purity Islets GSIR Index (Pre-culture Sample)        | For Information Only                                                                                                                                                                                 |
| Islets Quantity                                           | First Infusion: $\geq 5.0 \times 10^3$ IEQ/kg of Recipient's Body Weight (Total IEQ/infusion)<br>Subsequent Infusions: $\geq 4.0 \times 10^3$ IEQ/kg of Recipient's Body Weight (Total IEQ/infusion) |
| Viability                                                 | ≥70% in each product bag                                                                                                                                                                             |
| <b>Purity</b>                                             |                                                                                                                                                                                                      |
| Islets Concentration                                      | ≥20,000 Total IEQ/mL Total Settled Tissue Volume                                                                                                                                                     |
| <b>Safety</b>                                             |                                                                                                                                                                                                      |
| Appearance                                                | Light yellow to amber liquid with visible aggregates in each product bag                                                                                                                             |
| Endotoxins                                                | ≤5.0 EU/kg of Recipient's Body Weight (Total EU/infusion)                                                                                                                                            |
| Gram Stain (Islets Purity Levels Pre-combination Samples) | No Organisms Seen                                                                                                                                                                                    |

SUPPLEMENTARY DATA

Final Certificate of Analysis Fields

| Test                                                      | Requirement                                                                                                                                                                                                        |
|-----------------------------------------------------------|--------------------------------------------------------------------------------------------------------------------------------------------------------------------------------------------------------------------|
| <b>Identity</b>                                           |                                                                                                                                                                                                                    |
| Recipient Identity                                        | Recipient Study ID # and Recipient Medical Record Number on this CoA and on each infusion bag label are identical to that in the Production Batch Record, Section 12.3                                             |
| Islets Identity                                           | Islets are present in each product bag                                                                                                                                                                             |
| <b>Volumes in Bags</b>                                    |                                                                                                                                                                                                                    |
| Suspension Volume                                         | 200 mL per product bag<br>≤600 mL total in three product bags                                                                                                                                                      |
| Settled Tissue Volume                                     | ≤7.5 mL per product bag<br>≤15.0 mL total in three product bags                                                                                                                                                    |
| <b>Potency</b>                                            |                                                                                                                                                                                                                    |
| High Purity Islets GSIR Index (Pre-culture Sample)        | For Information Only                                                                                                                                                                                               |
| High Purity Islets GSIR Index (Post-culture Sample)       | Glucose Stimulated Insulin Release Index > 1                                                                                                                                                                       |
| Islets Quantity                                           | <u>First Infusion:</u> ≥5.0 x 10 <sup>3</sup> IEQ/kg of Recipient's Body Weight (Total IEQ/infusion)<br><u>Subsequent Infusions:</u> ≥4.0 x 10 <sup>3</sup> IEQ/kg of Recipient's Body Weight (Total IEQ/infusion) |
| Viability                                                 | ≥ 70% in each product bag                                                                                                                                                                                          |
| <b>Purity</b>                                             |                                                                                                                                                                                                                    |
| Islets Concentration                                      | ≥20,000 Total IEQ/mL Total Settled Tissue Volume                                                                                                                                                                   |
| <b>Safety</b>                                             |                                                                                                                                                                                                                    |
| Appearance                                                | Light yellow to amber liquid with visible aggregates in each product bag                                                                                                                                           |
| Endotoxins                                                | ≤5.0 EU/kg of Recipient's Body Weight (Total EU/infusion)                                                                                                                                                          |
| Gram Stain (Islets Purity Levels Pre-combination Samples) | No Organisms Seen                                                                                                                                                                                                  |
| Sterility (21CFR610.12 or validated alternate)            | No Growth in each product bag                                                                                                                                                                                      |

SUPPLEMENTARY DATA

**Supplementary Appendix S8. Study Treatment Regimen**

| Drug                                                    | Manufacturer                  | Indication                                                                                                  | Dosing                                                                                                                                                       | Target Trough Level                                  |
|---------------------------------------------------------|-------------------------------|-------------------------------------------------------------------------------------------------------------|--------------------------------------------------------------------------------------------------------------------------------------------------------------|------------------------------------------------------|
| ATG<br>(Thymoglobulin®)                                 | Sanofi/Genzyme Corporation    | Induction regimen for 1st transplant                                                                        | 0.5 mg/kg on day -2<br>1.0 mg/kg on day -1<br>1.5 mg/kg on days 0, +1, and +2                                                                                | N/A                                                  |
| Sirolimus<br>(Rapamune®)                                | Pfizer                        | Maintenance immunosuppression                                                                               | 0.05-0.2mg/kg on day -2<br>0.05-0.1mg/kg QD                                                                                                                  | 10-15 ng/mL through month 3<br>8-12 ng/mL thereafter |
| Tacrolimus<br>(Prograf®)                                | Astellas                      | Maintenance immunosuppression                                                                               | 0.015 mg/kg BID on day +1                                                                                                                                    | 3-6 ng/mL                                            |
| Cyclosporine<br>(Neoral®)                               | Novartis Pharmaceuticals      | Maintenance immunosuppression: substitute for tacrolimus due to intolerance                                 | 6 mg/kg/d in 2 divided doses                                                                                                                                 | 150-200 ng/mL                                        |
| Mycophenolate mofetil (MMF, Cellcept®)                  | Roche Palo                    | Maintenance immunosuppression: substitute for tacrolimus or sirolimus due to intolerance                    | 500-1500 mg BID                                                                                                                                              | N/A                                                  |
| Mycophenolate Sodium (Myfortic®)                        | Novartis Pharmaceuticals      | Maintenance immunosuppression: alternate substitute for tacrolimus, sirolimus, or MMF                       | 360 to 720 mg BID                                                                                                                                            | N/A                                                  |
| Basliximab<br>(Simulect®)                               | Novartis Pharmaceuticals      | Induction regimen for 2nd or 3rd transplants                                                                | 20 mg on day 0 and day +4                                                                                                                                    | N/A                                                  |
| Etanercept<br>(Enbrel®)                                 | Immunex/Amgen                 | Immunosuppressive/anti-inflammatory therapy for each transplant                                             | 50 mg IV on day 0<br>25 mg SC on days +3, +7 and +10                                                                                                         | N/A                                                  |
| Trimethoprim / sulfamethoxazole (Septra SS® / Bactrim®) | Mutual Pharmaceutical Company | Pneumocystis prophylaxis for each transplant                                                                | 80 mg/400 mg QD for 6 months                                                                                                                                 | N/A                                                  |
| Clotrimazole<br>(Mycelex Troche®)                       | Bayer                         | Antifungal prophylaxis for each transplant                                                                  | 1 troche QID for 3 months                                                                                                                                    | N/A                                                  |
| Valganciclovir<br>(Valcyte®)                            | Hoffmann - La Roche Inc       | Anti-CMV prophylaxis for each transplant. Adjusted or eliminated when donor and recipient are CMV negative. | 450 mg PO QD increasing to 900 mg QD by day 12 through week 14                                                                                               | N/A                                                  |
| Heparin                                                 | At investigator's discretion  | Anticoagulation prophylaxis for each transplant                                                             | 70 U/kg body weight divided equally in islet bags followed by 3U/kg/hr IV for next 4 hours. From 5-48 hours post-transplant, heparin titrated to achieve and | N/A                                                  |

SUPPLEMENTARY DATA

| Drug                  | Manufacturer                 | Indication                                      | Dosing                                                                                                                                                     | Target Trough Level |
|-----------------------|------------------------------|-------------------------------------------------|------------------------------------------------------------------------------------------------------------------------------------------------------------|---------------------|
|                       |                              |                                                 | maintain PTT= 50-60 seconds.                                                                                                                               |                     |
| Enoxaparin (Lovenox®) | Sanofi Aventis US            | Anticoagulation prophylaxis for each transplant | 30 mg SC BID starting 48 hours after transplant (when heparin discontinued) through day 7. Dose can be modified or extended at discretion of investigator. | N/A                 |
| aspirin               | At investigator's discretion | Anticoagulation prophylaxis for each transplant | 81 mg start PM 24 hours post-transplant and continued as medically indicated                                                                               | N/A                 |
| pentoxifylline        | At investigator's discretion | Anti-inflammatory for each transplant           | 400 mg slow release TID starting day -2 and continuing to day +7                                                                                           | N/A                 |
| acetaminophen         | At investigator's discretion | Premedication for each ATG infusion             | 650 mg PO/PR ½ hr before and midway through ATG infusion                                                                                                   | N/A                 |
| diphenhydramine       | At investigator's discretion | Premedication for each ATG infusion             | 50 mg PO ½ hr before and midway through ATG infusion                                                                                                       | N/A                 |
| methylprednisolone    | At investigator's discretion | Premedication for initial ATG infusion          | 1 mg/kg IV one hour prior to and as needed during infusion                                                                                                 | N/A                 |

SUPPLEMENTARY DATA

**Supplementary Appendix S9. Patient Listings for Primary Endpoint and Secondary Endpoint Components in Y1**

| Patient* | Primary Endpoint | HbA1c Level at Day 365 | Number of SHE Day 28-Day 365 | Number of TX | Total IEQ/kg | Insulin Independence at Day 75 | Insulin Independence at Day 365 |
|----------|------------------|------------------------|------------------------------|--------------|--------------|--------------------------------|---------------------------------|
| 01       | Success          | 5.7                    | 0                            | 1            | 9781         | Failure                        | Failure                         |
| 02       | Success          | 6.4                    | 0                            | 2            | 12,188       | Failure                        | Failure                         |
| 03       | Success          | 6.3                    | 0                            | 2            | 12,109       | Failure                        | Failure                         |
| 04       | Success          | 5.1                    | 0                            | 1            | 7445         | Success                        | Success                         |
| 05       | Success          | 6.1                    | 0                            | 3            | 18,200       | Failure                        | Failure                         |
| 06       | Success          | 6.9                    | 0                            | 1            | 5775         | Failure                        | Failure                         |
| 07       | Success          | 5.2                    | 0                            | 1            | 11,493       | Failure                        | Success                         |
| 08       | Success          | 5.5                    | 0                            | 1            | 12,221       | Failure                        | Success                         |
| 09       | Success          | 6.4                    | 0                            | 1            | 8163         | Failure                        | Failure                         |
| 10       | Success          | 5.3                    | 0                            | 2            | 14,706       | Failure                        | Failure                         |
| 11       | Success          | 5.7                    | 0                            | 2            | 13,769       | Failure                        | Insufficient data               |
| 12       | Success          | 5.4                    | 0                            | 2            | 13,335       | Failure                        | Success                         |
| 13       | Success          | 5.4                    | 0                            | 1            | 9080         | Success                        | Success                         |
| 14       | Success          | 6.6                    | 0                            | 2            | 16,953       | Insufficient data              | Failure                         |
| 15       | Success          | 5.8                    | 0                            | 2            | 19,470       | Failure                        | Failure                         |
| 16       | Success          | 5.6                    | 0                            | 2            | 15,354       | Failure                        | Success                         |
| 17       | Success          | 6.2                    | 0                            | 2            | 10,865       | Insufficient data              | Insufficient data               |
| 18       | Success          | 5.5                    | 0                            | 1            | 12,073       | Success                        | Success                         |
| 19       | Success          | 5.4                    | 0                            | 1            | 9450         | Success                        | Success                         |
| 20       | Success          | 5.4                    | 0                            | 1            | 11,069       | Failure                        | Success                         |
| 21       | Success          | 5.2                    | 0                            | 2            | 12,444       | Failure                        | Success                         |
| 22       | Success          | 5.5                    | 0                            | 1            | 7853         | Success                        | Success                         |
| 23       | Success          | 5.3                    | 0                            | 1            | 9218         | Success                        | Success                         |
| 24       | Success          | 5.6                    | 0                            | 2            | 12,509       | Failure                        | Success                         |
| 25       | Success          | 5.3                    | 0                            | 2            | 9480         | Failure                        | Success                         |
| 26       | Success          | 6.0                    | 0                            | 2            | 12,679       | Failure                        | Success                         |
| 27       | Success          | 5.2                    | 0                            | 1            | 6294         | Success                        | Success                         |
| 28       | Success          | 5.5                    | 0                            | 1            | 5924         | Success                        | Success                         |
| 29       | Success          | 5.4                    | 0                            | 2            | 12,152       | Failure                        | Success                         |

SUPPLEMENTARY DATA

| Patient* | Primary Endpoint | HbA1c Level at Day 365 | Number of SHE Day 28-Day 365 | Number of TX | Total IEQ/kg | Insulin Independence at Day 75 | Insulin Independence at Day 365 |
|----------|------------------|------------------------|------------------------------|--------------|--------------|--------------------------------|---------------------------------|
| 30       | Success          | 5.7                    | 0                            | 2            | 15,478       | Failure                        | Success                         |
| 31       | Success          | 5.7                    | 0                            | 2            | 10,595       | Failure                        | Insufficient data               |
| 32       | Success          | 4.8                    | 0                            | 2            | 12,988       | Failure                        | Success                         |
| 33       | Success          | 5.6                    | 0                            | 1            | 6325         | Success                        | Success                         |
| 34       | Success          | 5.6                    | 0                            | 1            | 5233         | Failure                        | Insufficient data               |
| 35       | Success          | 6.0                    | 0                            | 2            | 14,205       | Failure                        | Insufficient data               |
| 36       | Success          | 6.3                    | 0                            | 2            | 11,898       | Insufficient data              | Failure                         |
| 37       | Success          | 5.4                    | 0                            | 2            | 15,860       | Insufficient data              | Success                         |
| 38       | Success          | 6.6                    | 0                            | 1            | 7521         | Success                        | Success                         |
| 39       | Success          | 5.2                    | 0                            | 2            | 25,553       | Insufficient data              | Success                         |
| 40       | Success          | 5.8                    | 0                            | 2            | 16,507       | Failure                        | Failure                         |
| 41       | Success          | 5.2                    | 0                            | 2            | 12,550       | Failure                        | Success                         |
| 42       | Success          | 6.8                    | 0                            | 2            | 12,080       | Insufficient data              | Failure                         |
| 43       | Failure          | 7.0                    | 1                            | 1            | 8644         | Insufficient data              | Failure                         |
| 44       | Failure          | .                      | .                            | 1            | 8127         | Insufficient data              | Insufficient data               |
| 45       | Failure          | 7.3                    | 0                            | 1            | 7898         | Success                        | Failure                         |
| 46       | Failure          | .                      | .                            | 2            | 12,754       | Failure                        | Failure(termination)            |
| 47       | Failure          | 7.6                    | 3                            | 1            | 9325         | Failure                        | Insufficient data               |
| 48       | Failure          | .                      | .                            | 1            | 5277         | Failure                        | Failure(termination)            |

\*Patient numbers in this table are not in temporal order.

SUPPLEMENTARY DATA

**Supplementary Appendix S10. Reasons for Failure to Meet Primary Endpoint (HbA1C<7%, and no SHE\* between days 28 and 365 following first transplant).**

| Patient** | Failed/Insufficient data | Comments                                                                                                          |
|-----------|--------------------------|-------------------------------------------------------------------------------------------------------------------|
| 43        | Failed                   | HbA1c at Day 365 post-initial transplant was 7.0% (53 mmol/mol). Patient also had SHE between Day 28 and Day 365. |
| 44        | Insufficient data        | Lost to follow up.                                                                                                |
| 45        | Failed                   | HbA1c at Day 365 post-initial transplant was 7.3% (56 mmol/mol).                                                  |
| 46        | Insufficient data        | Lost to follow-up.                                                                                                |
| 47        | Failed                   | HbA1c at Day 365 post-initial transplant was 7.6%(60 mmol/mol). Patient also had SHE between Day 28 and Day 365.  |
| 48        | Insufficient data        | Withdrew from study 5 months following initial transplant.                                                        |

\* Severe hypoglycemic episodes

\*\*Patient numbers in this table are not in temporal order.

SUPPLEMENTARY DATA

Supplementary Appendix S11. Supplementary Figure 1 Containing CGMS Data

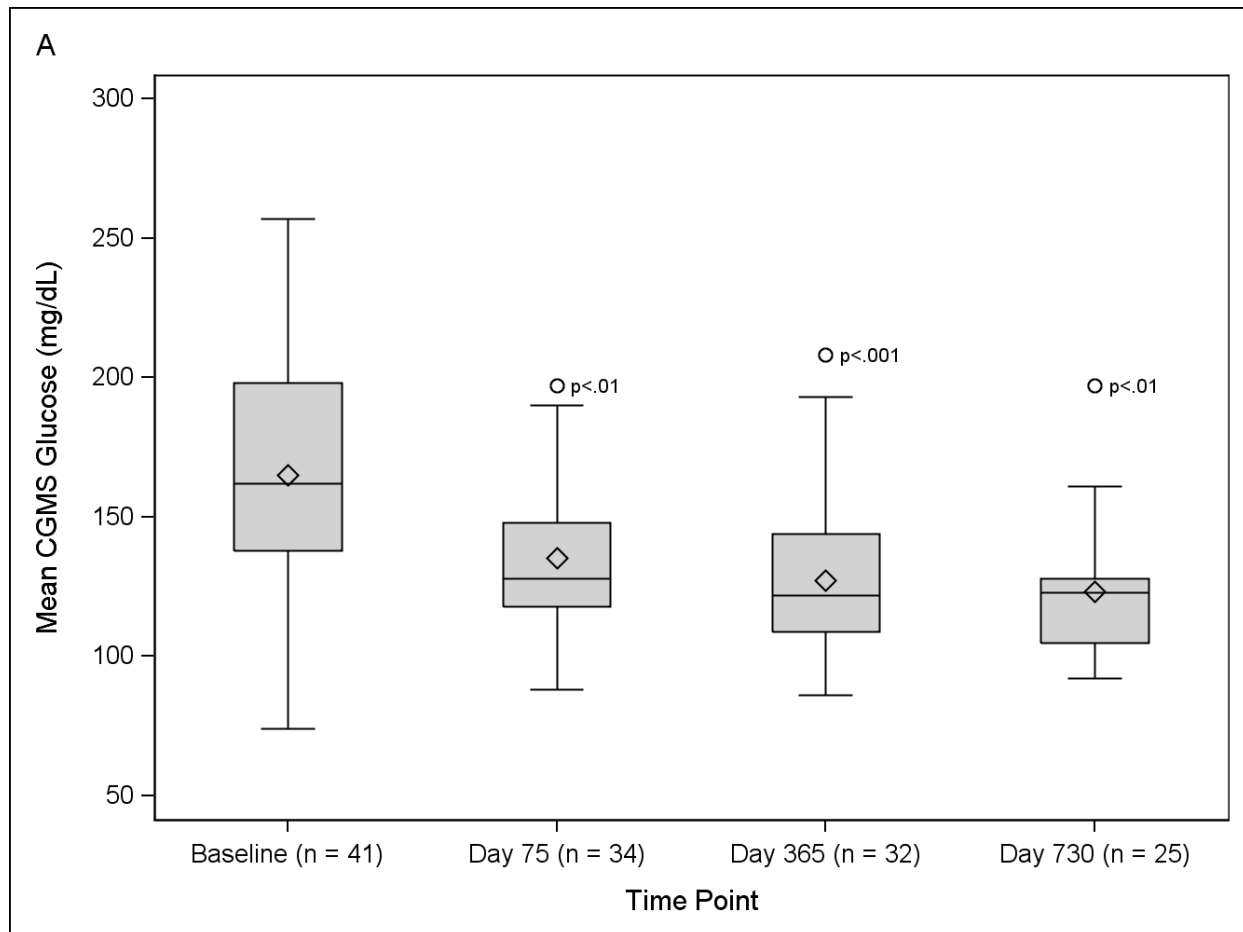



SUPPLEMENTARY DATA

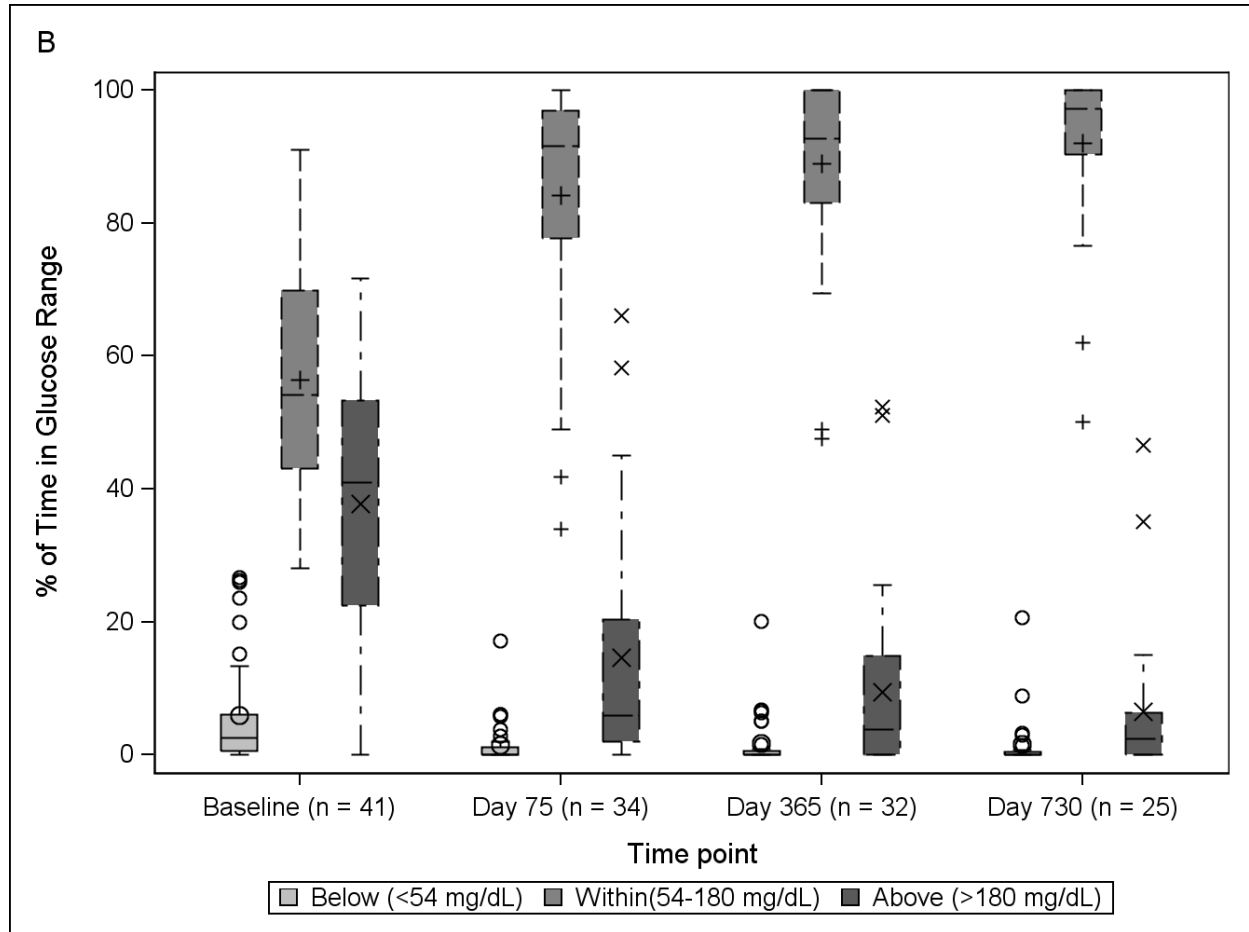

SUPPLEMENTARY DATA

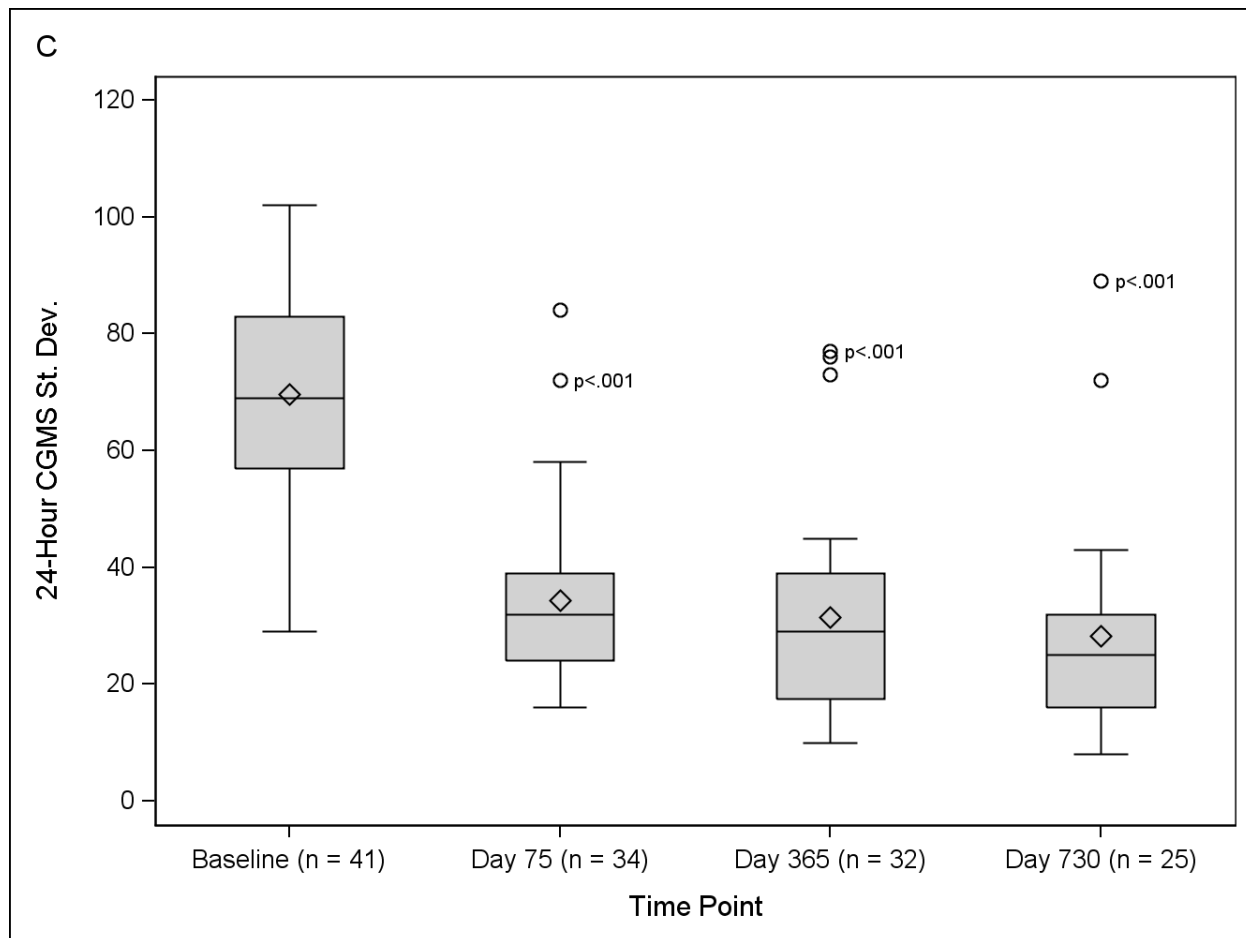

## SUPPLEMENTARY DATA

### **Panel A:**

Box plots of CGMS mean glucose at baseline, at Day 75, Day 365 and Day 730 following the first islet infusion. Median CGMS wear time was 72 hours at baseline and Y1 and 71 hours at Y2.

The Wilcoxon Signed Rank Test for paired outcomes was used to compare the median CGMS glucose between baseline (N = 41) and Day 75 (N = 34) between baseline and Day 365 (N = 32), and between baseline and Day 730 (N = 23).

The Bonferroni method was used to adjust the level of significance for these three comparisons in order to preserve the overall Type 1 error rate of 0.05.

The adjusted p-value for the comparison between baseline and Day 75 is 0.0053.

The adjusted p-value for the comparison between baseline and Day 365 is 0.0010.

The adjusted p-value for the comparison between baseline and Day 730 is 0.0010.

### **Panel B:**

Box plots of CGMS glucose below 54, within target of 54 and 180, and above 180 mg/dL at baseline, Day 75, Day 365 and Day 730 following the first islet infusion.

The Wilcoxon Signed Rank Test was used to compare the percent of time in each range among the time periods

For each blood glucose range (<54 mg/dL, 54–180 mg/dL, and >180 mg/dL) the Bonferroni method was used to adjust the level of significance for the two comparisons made between baseline (N = 41) and Day 75 (N = 34), between baseline and Day 365 (N = 32), and between baseline and Day 730 (N = 23).

The adjusted p-value for the comparison of the percent of time blood glucose was below 54 mg/dL between baseline and Day 75 is 0.0016.

The adjusted p-value for the comparison of the percent time blood glucose was below 54 mg/dL between baseline and Day 365 is 0.0178.

The adjusted p-value for the comparison of the percent of time blood glucose was below 54 mg/dL between baseline and Day 730 is 0.0010.

All other adjusted p-values are less than 0.0003.

### **Panel C:**

Box plots of CGMS glucose standard deviation at baseline, Day 75, Day 365 and Day 730 following the first islet infusion.

The Wilcoxon Signed Rank test was used to compare the median CGMS glucose standard deviation between baseline (N = 41) and Day 75 (N = 34) between baseline and Day 365 (N = 32), and between baseline and Day 730 (N = 23).

The Bonferroni method was used to adjust the level of significance for these three comparisons in order to preserve the overall Type 1 error rate of 0.05.

The adjusted p-values for these three tests are less than 0.0003.

SUPPLEMENTARY DATA

**Supplementary Appendix S12. Patient Disposition Table Through Y2**

|          |                         |                  | Outcomes at Year 1 Post-initial Transplant |           |     |                      | Outcomes at Year 2 Post-initial Transplant   |       |        |                      |                                                                                                                                                                       |
|----------|-------------------------|------------------|--------------------------------------------|-----------|-----|----------------------|----------------------------------------------|-------|--------|----------------------|-----------------------------------------------------------------------------------------------------------------------------------------------------------------------|
| Patient* | Initial Transplant Date | Termination Date | Primary endpoint                           | HbA1c (%) | SHE | Insulin Independence | Composite HbA1c and SHE (Secondary) Endpoint | HbA1c | SHE ** | Insulin Independence | Termination Reason/Comments                                                                                                                                           |
| 1        | 17JUL2009               | 23JUL2010        | Success                                    | 5.7       | 0   | Failure              | Terminated                                   | .     | 0      | Terminated           | Patient consented under V3 of the protocol, which called for only 1 year of follow-up. Last HbA1c 7/20/10 = 5.7% (39 mmol/mol).                                       |
| 2        | 04MAR2011               | 06AUG2013        | Success                                    | 6.4       | 0   | Failure              | Failure                                      | 7.2   | 0      | Failure              |                                                                                                                                                                       |
| 3        | 11JAN2011               | 23NOV2012        | Success                                    | 6.3       | 0   | Failure              | Failure                                      | .     | 0      | Failure              | This patient terminated before Y2 but within the 3-month window for that visit, so s/he is considered a failure rather than a termination. Last HbA1c 9/18/12 = 6.6%. |
| 4        | 01AUG2011               | 20AUG2013        | Success                                    | 5.1       | 0   | Success              | Success                                      | 6.2   | 0      | Failure              |                                                                                                                                                                       |
| 5        | 05AUG2011               | 18SEP2012        | Success                                    | 6.1       | 0   | Failure              | Terminated                                   | .     | 0      | Terminated           | Patient withdrew consent. Last HbA1c 9/18/12 = 6.2% (44 mmol/mol).                                                                                                    |
| 6        | 24OCT2010               | 19MAY2012        | Success                                    | 6.9       | 0   | Failure              | Terminated                                   | .     | 0      | Terminated           | Second transplant in non-CIT protocol. Last HbA1c 4/12/12 = 6.9% (52 mmol/mol).                                                                                       |
| 7        | 12JUL2010               | 16JUL2012        | Success                                    | 5.2       | 0   | Success              | Success                                      | 5.8   | 0      | Failure              |                                                                                                                                                                       |
| 8        | 23MAY2011               | 03JUN2013        | Success                                    | 5.5       | 0   | Success              | Success                                      | 5.3   | 0      | Failure              |                                                                                                                                                                       |
| 9        | 28APR2010               | 29APR2012        | Success                                    | 6.4       | 0   | Failure              | Success                                      | 6.2   | 0      | Failure              |                                                                                                                                                                       |
| 10       | 04APR2010               | 13DEC2012        | Success                                    | 5.3       | 0   | Failure              | Success                                      | 5.6   | 0      | Failure              |                                                                                                                                                                       |
| 11       | 10JAN2010               | 30MAY2012        | Success                                    | 5.7       | 0   | Failure              | Success                                      | 6.1   | 0      | Failure              |                                                                                                                                                                       |

SUPPLEMENTARY DATA

|          |                         |                  | Outcomes at Year 1 Post-initial Transplant |           |     |                      | Outcomes at Year 2 Post-initial Transplant   |       |        |                      |                             |
|----------|-------------------------|------------------|--------------------------------------------|-----------|-----|----------------------|----------------------------------------------|-------|--------|----------------------|-----------------------------|
| Patient* | Initial Transplant Date | Termination Date | Primary endpoint                           | HbA1c (%) | SHE | Insulin Independence | Composite HbA1c and SHE (Secondary) Endpoint | HbA1c | SHE ** | Insulin Independence | Termination Reason/Comments |
| 12       | 19JUL2011               | 16JAN2014        | Success                                    | 5.4       | 0   | Success              | Success                                      | 5.5   | 0      | Success              |                             |
| 13       | 24JAN2010               | 26JAN2012        | Success                                    | 5.4       | 0   | Success              | Success                                      | 5.6   | 0      | Success              |                             |
| 14       | 26AUG2011               | 02JAN2014        | Success                                    | 6.6       | 0   | Failure              | Success                                      | 6.1   | 0      | Failure              |                             |
| 15       | 16JUL2010               | 09MAR2013        | Success                                    | 5.8       | 0   | Failure              | Failure                                      | 9.2   | 2      | Failure              |                             |
| 16       | 21FEB2011               | 05JUL2013        | Success                                    | 5.6       | 0   | Success              | Success                                      | 4.8   | 0      | Failure              |                             |
| 17       | 22SEP2011               | 28MAY2014        | Success                                    | 6.2       | 0   | Failure              | Success                                      | 6.6   | 0      | Failure              |                             |
| 18       | 12OCT2008               | 18OCT2012        | Success                                    | 5.5       | 0   | Success              | Success                                      | 5.3   | 0      | Failure              |                             |
| 19       | 12MAY2010               | 09MAY2012        | Success                                    | 5.4       | 0   | Success              | Success                                      | 5.5   | 0      | Failure              |                             |
| 20       | 10MAR2010               | 13MAR2012        | Success                                    | 5.4       | 0   | Success              | Success                                      | 5.6   | 0      | Success              |                             |
| 21       | 07MAR2011               | 24JUL2013        | Success                                    | 5.2       | 0   | Success              | Success                                      | 5.4   | 0      | Success              |                             |
| 22       | 04NOV2008               | 09NOV2010        | Success                                    | 5.5       | 0   | Success              | Success                                      | 5.5   | 0      | Success              |                             |
| 23       | 07JUN2010               | 06JUN2012        | Success                                    | 5.3       | 0   | Success              | Success                                      | 5.6   | 0      | Failure              |                             |
| 24       | 03SEP2010               | 08JAN2013        | Success                                    | 5.6       | 0   | Success              | Success                                      | 5.6   | 0      | Failure              |                             |
| 25       | 12JUN2011               | 01OCT2013        | Success                                    | 5.3       | 0   | Success              | Success                                      | 5.5   | 0      | Success              |                             |
| 26       | 07JUL2011               | 28APR2014        | Success                                    | 6         | 0   | Success              | Success                                      | 5.9   | 0      | Failure              |                             |
| 27       | 31MAR2011               | 01APR2013        | Success                                    | 5.2       | 0   | Success              | Success                                      | 5.3   | 0      | Success              |                             |
| 28       | 26FEB2009               | 02MAR2011        | Success                                    | 5.5       | 0   | Success              | Success                                      | 5.6   | 0      | Success              |                             |
| 29       | 10SEP2011               | 04DEC2013        | Success                                    | 5.4       | 0   | Success              | Success                                      | 5.4   | 0      | Success              |                             |
| 30       | 17SEP2011               | 22JAN2014        | Success                                    | 5.7       | 0   | Success              | Success                                      | 6.1   | 0      | Success              |                             |
| 31       | 30MAY2010               | 01NOV2012        | Success                                    | 5.7       | 0   | Failure              | Success                                      | 6.2   | 0      | Failure              |                             |
| 32       | 09JUN2009               | 05DEC2011        | Success                                    | 4.8       | 0   | Success              | Success                                      | 5.4   | 0      | Failure              |                             |

SUPPLEMENTARY DATA

|          |                         |                  | Outcomes at Year 1 Post-initial Transplant |           |     |                      | Outcomes at Year 2 Post-initial Transplant   |       |        |                      |                                                                                                                                                                                                                                                                                                                                          |
|----------|-------------------------|------------------|--------------------------------------------|-----------|-----|----------------------|----------------------------------------------|-------|--------|----------------------|------------------------------------------------------------------------------------------------------------------------------------------------------------------------------------------------------------------------------------------------------------------------------------------------------------------------------------------|
| Patient* | Initial Transplant Date | Termination Date | Primary endpoint                           | HbA1c (%) | SHE | Insulin Independence | Composite HbA1c and SHE (Secondary) Endpoint | HbA1c | SHE ** | Insulin Independence | Termination Reason/Comments                                                                                                                                                                                                                                                                                                              |
| 33       | 24MAY2009               | 24JUN2011        | Success                                    | 5.6       | 0   | Success              | Success                                      | 5.6   | 0      | Success              |                                                                                                                                                                                                                                                                                                                                          |
| 34       | 06MAY2009               | 09MAY2011        | Success                                    | 5.6       | 0   | Failure              | Success                                      | 5.6   | 0      | Failure              |                                                                                                                                                                                                                                                                                                                                          |
| 35       | 01SEP2011               | 12FEB2014        | Success                                    | 6         | 0   | Failure              | Failure                                      | 7.7   | 0      | Failure              |                                                                                                                                                                                                                                                                                                                                          |
| 36       | 18SEP2011               | 03APR2014        | Success                                    | 6.3       | 0   | Failure              | Success                                      | 6     | 0      | Failure              |                                                                                                                                                                                                                                                                                                                                          |
| 37       | 10SEP2011               | 13JAN2014        | Success                                    | 5.4       | 0   | Success              | Success                                      | 5.3   | 0      | Failure              |                                                                                                                                                                                                                                                                                                                                          |
| 38       | 29MAR2010               | 06APR2012        | Success                                    | 6.6       | 0   | Success              | Success                                      | 6.1   | 0      | Failure              |                                                                                                                                                                                                                                                                                                                                          |
| 39       | 06JUN2010               | 02SEP2012        | Success                                    | 5.2       | 0   | Success              | Success                                      | 4.9   | 0      | Failure              |                                                                                                                                                                                                                                                                                                                                          |
| 40       | 11JAN2011               | 14JUN2013        | Success                                    | 5.8       | 0   | Failure              | Success                                      | 6.1   | 0      | Success              |                                                                                                                                                                                                                                                                                                                                          |
| 41       | 17FEB2010               | 12DEC2011        | Success                                    | 5.2       | 0   | Success              | Failure                                      | .     | 0      | Failure              | This patient terminated before Y2 but within the 3-month window for that visit, so s/he is considered a failure rather than a termination. She began taking Januvia without discussing in advance with study staff—because she wanted to reduce her insulin needs—and was therefore terminated. Last HbA1c 9/19/11 = 5.6% (38 mmol/mol). |
| 42       | 21JUL2011               | 03APR2014        | Success                                    | 6.8       | 0   | Failure              | Failure                                      | 7.6   | 0      | Failure              |                                                                                                                                                                                                                                                                                                                                          |
| 43       | 03MAR2009               | 11APR2011        | Failure                                    | 7         | 1   | Failure              | Failure                                      | 7     | 2      | Failure              |                                                                                                                                                                                                                                                                                                                                          |
| 44       | 07MAR2009               | 26JUL2010        | Failure                                    | .         | .   | Failure              | Terminated                                   | .     | .      | Terminated           | Lost to follow-up. Last HbA1c 11/25/2008 = 8.4% (68 mmol/mol).                                                                                                                                                                                                                                                                           |

SUPPLEMENTARY DATA

|          |                         |                  | Outcomes at Year 1 Post-initial Transplant |           |     |                      | Outcomes at Year 2 Post-initial Transplant   |       |        |                      |                                                                    |
|----------|-------------------------|------------------|--------------------------------------------|-----------|-----|----------------------|----------------------------------------------|-------|--------|----------------------|--------------------------------------------------------------------|
| Patient* | Initial Transplant Date | Termination Date | Primary endpoint                           | HbA1c (%) | SHE | Insulin Independence | Composite HbA1c and SHE (Secondary) Endpoint | HbA1c | SHE ** | Insulin Independence | Termination Reason/Comments                                        |
| 45       | 07MAY2010               | 07MAY2012        | Failure                                    | 7.3       | 0   | Failure              | Success                                      | 5.9   | 0      | Success              | This patient had parvovirus that may have affected Y1 HbA1c.       |
| 46       | 28JAN2011               | 02OCT2011        | Terminated                                 | .         | 0   | Terminated           | Terminated                                   | .     | 0      | Terminated           | Lost to follow-up. Last HbA1c 4/15/11 = 5.5% (37 mmol/mol).        |
| 47       | 24SEP2011               | 11OCT2013        | Failure                                    | 7.6       | 3   | Failure              | Failure                                      | 7.8   | 6      | Failure              |                                                                    |
| 48       | 23AUG2011               | 03MAY2012        | Terminated                                 | .         | 0   | Terminated           | Terminated                                   | .     | 0      | Terminated           | Patient withdrew consent. Last HbA1c 2/20/12 = 4.6% (27 mmol/mol). |

\*Patient numbers in this table are not in temporal order.

\*\*SHE cumulative at Y2.

SUPPLEMENTARY DATA

**Supplementary Appendix S13. Reasons for Failure to Complete 2 Years of Follow-Up in CIT-07**

| <b>Patient*</b> | <b>Comments</b>                                                                                     |
|-----------------|-----------------------------------------------------------------------------------------------------|
| 1               | Consented under an early version of the CIT-07 protocol that called for only one year of follow-up. |
| 3               | Withdrew consent due to frequency of study visits.                                                  |
| 5               | Withdrew consent due to frequency of study visits.                                                  |
| 6               | Received an islet transplant in a study outside of CIT.                                             |
| 41              | Started taking Januvia, a study prohibited medication; withdrawn from study.                        |

\*Patient numbers in this table are not in temporal order



SUPPLEMENTARY DATA

**Supplementary Appendix S14. Serious Adverse Event Listing**

|                                                      |                                           | Year        |                          |             |                          |                  |                          |
|------------------------------------------------------|-------------------------------------------|-------------|--------------------------|-------------|--------------------------|------------------|--------------------------|
|                                                      |                                           | 1           |                          | 2           |                          | Cumulative Total |                          |
| System Organ Class                                   | Preferred Term                            | # of Events | # of patients with event | # of Events | # of patients with event | # of Events      | # of patients with event |
| Blood and lymphatic system disorders                 | Febrile neutropenia                       | 3           | 2                        | 0           | 0                        | 3                | 2                        |
|                                                      | Neutropenia                               | 3           | 2                        | 0           | 0                        | 3                | 2                        |
|                                                      | Pancytopenia                              | 1           | 1                        | 0           | 0                        | 1                | 1                        |
| Cardiac disorders                                    | Atrial flutter                            | 1           | 1                        | 0           | 0                        | 1                | 1                        |
| Gastrointestinal disorders                           | Abdominal pain upper                      | 1           | 1                        | 0           | 0                        | 1                | 1                        |
|                                                      | Vomiting                                  | 2           | 2                        | 0           | 0                        | 2                | 2                        |
| General disorders and administration site conditions | Adverse drug reaction                     | 1           | 1                        | 0           | 0                        | 1                | 1                        |
|                                                      | Chest discomfort                          | 0           | 0                        | 1           | 1                        | 1                | 1                        |
|                                                      | Infusion site haemorrhage <sup>1</sup>    | 1           | 1                        | 0           | 0                        | 1                | 1                        |
|                                                      | Non-cardiac chest pain                    | 2           | 2                        | 0           | 0                        | 2                | 2                        |
| Immune system disorders                              | Cytokine release syndrome                 | 1           | 1                        | 0           | 0                        | 1                | 1                        |
|                                                      | Food allergy                              | 0           | 0                        | 1           | 1                        | 1                | 1                        |
|                                                      | Serum sickness                            | 1           | 1                        | 0           | 0                        | 1                | 1                        |
| Infections and infestations                          | Appendicitis                              | 0           | 0                        | 1           | 1                        | 1                | 1                        |
|                                                      | Gastroenteritis                           | 2           | 2                        | 0           | 0                        | 2                | 2                        |
|                                                      | Pneumocystis jiroveci pneumonia           | 0           | 0                        | 1           | 1                        | 1                | 1                        |
|                                                      | Pyelonephritis                            | 0           | 0                        | 1           | 1                        | 1                | 1                        |
| Injury, poisoning and procedural complications       | Drug toxicity                             | 1           | 1                        | 0           | 0                        | 1                | 1                        |
|                                                      | Hepatic haematoma <sup>2</sup>            | 1           | 1                        | 0           | 0                        | 1                | 1                        |
|                                                      | Hip fracture                              | 0           | 0                        | 1           | 1                        | 1                | 1                        |
|                                                      | Medication error                          | 1           | 1                        | 0           | 0                        | 1                | 1                        |
|                                                      | Post procedural complication <sup>1</sup> | 2           | 2                        | 0           | 0                        | 2                | 2                        |
|                                                      | Post procedural haemorrhage <sup>1</sup>  | 2           | 2                        | 0           | 0                        | 2                | 2                        |
| Investigations                                       | Immunosuppressant drug level increased    | 1           | 1                        | 0           | 0                        | 1                | 1                        |
| Metabolism and nutrition disorders                   | Hypoglycaemic unconsciousness             | 1           | 1                        | 1           | 1                        | 2                | 1                        |
| Nervous system disorders                             | Dementia                                  | 0           | 0                        | 1           | 1                        | 1                | 1                        |

SUPPLEMENTARY DATA

|                             |                     | Year        |                          |             |                          |                  |                          |
|-----------------------------|---------------------|-------------|--------------------------|-------------|--------------------------|------------------|--------------------------|
|                             |                     | 1           |                          | 2           |                          | Cumulative Total |                          |
| System Organ Class          | Preferred Term      | # of Events | # of patients with event | # of Events | # of patients with event | # of Events      | # of patients with event |
| Psychiatric disorders       | Conversion disorder | 1           | 1                        | 0           | 0                        | 1                | 1                        |
| Renal and urinary disorders | Renal failure acute | 1           | 1                        | 0           | 0                        | 1                | 1                        |

<sup>1</sup> Procedure-related bleeding events.

<sup>2</sup> Secondary to motor vehicle accident.

SUPPLEMENTARY DATA

**Supplementary Appendix S15. Serious Adverse Event Descriptions**

| <b>System Organ Class</b>            | <b>Preferred Term</b> | <b>Patient</b> | <b>Description</b>                                                                                                                                                                                                                                                                                                                                                                                                                                                                             |
|--------------------------------------|-----------------------|----------------|------------------------------------------------------------------------------------------------------------------------------------------------------------------------------------------------------------------------------------------------------------------------------------------------------------------------------------------------------------------------------------------------------------------------------------------------------------------------------------------------|
| Blood and lymphatic system disorders | Febrile neutropenia   | 9              | The patient had neutropenia and fever 3 days after islet transplantation, attributed to conditioning regime and/or immunosuppression. The event resolved without sequelae on the following day.                                                                                                                                                                                                                                                                                                |
| Blood and lymphatic system disorders | Febrile neutropenia   | 28             | The patient had neutropenia with fever 26 days after the initial islet transplant, attributed to the conditioning regimen and/or ongoing immunosuppression and/or infection prophylaxis (valganciclovir and TMP/SMX). The valganciclovir and TMP/SMX doses were reduced. The neutropenia resolved after a single dose of G-CSF and dose reduction of valganciclovir and switch from TMP/SMX to inhaled pentamidine. The event resolved without sequelae at approximately 5 months after onset. |
| Blood and lymphatic system disorders | Febrile neutropenia   | 28             | The patient was readmitted 3 days after a febrile neutropenia event, 34 days after the initial islet transplant, for continued fatigue. The patient had slow resolution with supportive care. The event was attributed to immunosuppression and/or the conditioning regimen. The event resolved without sequelae in just over 3 weeks.                                                                                                                                                         |
| Blood and lymphatic system disorders | Neutropenia           | 33             | Starting 18 days after initial islet transplantation, the patient was diagnosed with asymptomatic neutropenia, and was treated with daily doses of G-CSF for three days, with valganciclovir and TMP/SMX held until WBC>3.0. The event resolved without sequelae in three days.                                                                                                                                                                                                                |
| Blood and lymphatic system disorders | Neutropenia           | 47             | The patient was diagnosed with asymptomatic neutropenia, 2 days after initial islet transplantation. The thymoglobulin and TMP/SMX doses were reduced and the patient was treated with a single dose of G-CSF. The event was attributed to immunosuppression and/or the conditioning regimen. The event resolved without sequelae on the following day.                                                                                                                                        |
| Blood and lymphatic system disorders | Neutropenia           | 47             | The patient was diagnosed with recurrent asymptomatic neutropenia starting 74 days after initial islet transplantation, attributed to the conditioning regimen and/or immunosuppression. The patient was treated with three doses of G-CSF and the sirolimus dose was reduced by 20%. The event resolved without sequelae after one month.                                                                                                                                                     |
| Blood and lymphatic system disorders | Pancytopenia          | 3              | The patient was noted to have leukopenia, mild anemia and thrombocytopenia 2 days after initial islet transplant. The event was attributed to the immunosuppression and/or conditioning regimen. A single dose of G-CSF was given with a brisk response. The event resolved without sequelae on the following day.                                                                                                                                                                             |

SUPPLEMENTARY DATA

| System Organ Class                                   | Preferred Term            | Patient | Description                                                                                                                                                                                                                                                                                                                                                                                                                                                                                        |
|------------------------------------------------------|---------------------------|---------|----------------------------------------------------------------------------------------------------------------------------------------------------------------------------------------------------------------------------------------------------------------------------------------------------------------------------------------------------------------------------------------------------------------------------------------------------------------------------------------------------|
| Cardiac disorders                                    | Atrial flutter            | 38      | The patient experienced asymptomatic, irregular tachycardia (HR=108) and subsequently was diagnosed with atrial flutter on the 2nd day after initial islet transplant. The event was evaluated as being possibly related to the islet infusion procedure or possibly related to the immunosuppressive and conditioning regimen. The patient was treated with cardioversion and four weeks of coumadin anticoagulation. The event did not recur and resolved without sequelae on the following day. |
| Gastrointestinal disorders                           | Abdominal pain upper      | 40      | The patient reported epigastric pain 8 days after initial islet transplantation. A multisystem workup was negative except for a markedly elevated sirolimus level (25), with pain resolving with resolution of elevated sirolimus levels. The event was attributed to elevated sirolimus levels and/or late onset pain associated with the islet infusion procedure. The event resolved without sequelae on the following day.                                                                     |
| Gastrointestinal disorders                           | Vomiting                  | 18      | The patient experienced vomiting and headache on day 5 after the initial islet transplant. The event was attributed to the islet infusion procedure and/or immunosuppression, and/or the patient's established history of migraine. The event resolved without sequelae on the following day.                                                                                                                                                                                                      |
| Gastrointestinal disorders                           | Vomiting                  | 28      | The patient reported worsening nausea and vomiting on 3 days after initial islet transplantation. The patient was admitted for supportive care; immunosuppressant doses were reduced, with subsequent resolution of symptoms. The event was attributed to immunosuppression. The event resolved without sequelae two days later.                                                                                                                                                                   |
| General disorders and administration site conditions | Adverse drug reaction     | 45      | During pre-transplant conditioning, the patient developed urticaria on the face, abdomen and back. The event was attributed to thymoglobulin. The patient received a 7 day course of prednisone, and the planned islet transplant was cancelled; the patient subsequently received a transplant approximately 6 months later. The event resolved without sequelae approximately six weeks after onset.                                                                                             |
| General disorders and administration site conditions | Chest discomfort          | 16      | Approximately 12 and 17 months after islet transplantation procedures, the patient reported chest pressure radiating across the upper chest with dyspnea and palpitation. During the subsequent hospitalization, the workup was negative for acute MI or cardiac ischemia. Orthostatic hypotension was newly diagnosed. The event was not attributed to the islet product or infusion and not attributed to the IS regimen or infectious prophylaxis. The event resolved one day later.            |
| General disorders and administration site conditions | Infusion site haemorrhage | 27      | The patient complained of nausea and upper abdominal pain one day after the islet transplant, performed via percutaneous access to the portal vein. The workup led to laparoscopic evacuation of intra-abdominal blood. The event was attributed to the islet infusion procedure. The event resolved without sequelae.                                                                                                                                                                             |

SUPPLEMENTARY DATA

| System Organ Class                                   | Preferred Term            | Patient | Description                                                                                                                                                                                                                                                                                                                                                                                                                                                                                                                                                                                                                                                                                                                                   |
|------------------------------------------------------|---------------------------|---------|-----------------------------------------------------------------------------------------------------------------------------------------------------------------------------------------------------------------------------------------------------------------------------------------------------------------------------------------------------------------------------------------------------------------------------------------------------------------------------------------------------------------------------------------------------------------------------------------------------------------------------------------------------------------------------------------------------------------------------------------------|
| General disorders and administration site conditions | Non-cardiac chest pain    | 11      | Approximately 2 months and 6 months after islet transplantation procedures, and one day after a follow-up visit, the patient was hospitalized with complaints of chest pain and palpitations. Clinical evaluation directed at possible cardiac ischemia or PE etiologies was negative. Metoprolol was started to treat a pre-existing history of episodic palpitations. No specific etiology was uncovered. The event was not attributed to the islet product or infusion and not attributed to the IS regimen or infectious prophylaxis. The event resolved without sequelae after one day.                                                                                                                                                  |
| General disorders and administration site conditions | Non-cardiac chest pain    | 29      | Approximately 4 months and 6 months after islet transplantation procedures, the patient experienced sudden left subscapular pain, radiating to the anterior chest, exacerbated by breathing, and was admitted with concern for cardiac ischemic or PE etiologies, but the workup was negative. No specific etiology was found. The event was not attributed to the transplant or the immunosuppressive or infectious prophylaxis. The event resolved without sequelae after 2 weeks.                                                                                                                                                                                                                                                          |
| Immune system disorders                              | Cytokine release syndrome | 31      | Prior to this event, the patient experienced multiple symptoms during pre-transplant ATG, including diaphoresis, flushing, headache, emesis. Post-transplant ATG doses were reduced and these were tolerated. Heparin therapy was also discontinued due to thrombocytopenia. On day 5 after transplant, several hours prior to a scheduled ATG infusion, the patient had the onset of headache nausea, diaphoresis, photosensitivity and difficulty speaking while at home. The scheduled ATG dose was not given, investigations/consultations including head CT and MRA were negative, and symptoms resolved with supportive care. The event was attributed to the immunosuppressive conditioning regimen. The event resolved one day later. |
| Immune system disorders                              | Food allergy              | 29      | Approximately 11 months and 14 months after islet transplantations, the patient reported acute difficulty breathing after eating shrimp. The patient was seen in a local ER and was administered two doses of epinephrine. Subsequent outpatient allergy consultation diagnosed an allergy to shrimp tropomyosin. The patient was advised to avoid crab and lobster also. The event was not attributed as related to the islets or the procedure, nor to the immunosuppression or infection prophylaxis. The event was reported as resolved approximately three weeks later without sequelae.                                                                                                                                                 |

SUPPLEMENTARY DATA

| <b>System Organ Class</b>   | <b>Preferred Term</b> | <b>Patient</b> | <b>Description</b>                                                                                                                                                                                                                                                                                                                                                                                                                                                                                                                                                               |
|-----------------------------|-----------------------|----------------|----------------------------------------------------------------------------------------------------------------------------------------------------------------------------------------------------------------------------------------------------------------------------------------------------------------------------------------------------------------------------------------------------------------------------------------------------------------------------------------------------------------------------------------------------------------------------------|
| Immune system disorders     | Serum sickness        | 45             | Subsequent to pre-transplantation conditioning, the patient experienced a persistent rash, recurring after the completion of a 7 day course of prednisone for an allergic reaction attributed to thymoglobulin. Low levels of complement C3 and C4 were interpreted as consistent with serum sickness. A longer tapering course of prednisone was given. The event was attributed to the immunosuppressive conditioning regimen; the scheduled islet infusion had already been cancelled. The event was reported as resolved without sequelae approximately 6 weeks after onset. |
| Infections and infestations | Appendicitis          | 29             | 17 months after initial islet transplant and 15 months after 2nd islet transplant, the patient presented with nausea, RUQ pain with rebound. After abdominal ultrasound, the patient had an uncomplicated laproscopic appendectomy. The event was not attributed to the transplanted islets or the procedure; the event was not attributed to the immunosuppressive regimen or anti-infective prophylaxis. The event was reported as resolved without sequelae approximately 3 weeks after onset.                                                                                |
| Infections and infestations | Gastroenteritis       | 18             | The patient presented with headache, nausea and vomiting, 70 days after initial islet transplant. The event was not attributed to the islets or procedure, and not attributed to the immunosuppression or infection prophylaxis. The event was attributed to the patient's pre-existing history of migraine. The event was reported as resolved without sequelae 2 days later.                                                                                                                                                                                                   |
| Infections and infestations | Gastroenteritis       | 30             | Approximately 4 months and 7 months after islet transplantation procedures, the patient developed acute nausea vomiting and diarrhea shortly after a salmon lunch. The symptoms resolved with hospitalization, hydration, and supportive care. The event was considered to be non-infectious, and not attributed to the islets or the procedure, nor associated with the immunosuppression or anti-infection prophylaxis. The event was reported as resolved without sequelae one day after onset.                                                                               |

SUPPLEMENTARY DATA

| System Organ Class                             | Preferred Term                  | Patient | Description                                                                                                                                                                                                                                                                                                                                                                                                                                                                                                                                                                                                                                                                                                                                                                                                                                                                                                                                                                                                                                                                                                           |
|------------------------------------------------|---------------------------------|---------|-----------------------------------------------------------------------------------------------------------------------------------------------------------------------------------------------------------------------------------------------------------------------------------------------------------------------------------------------------------------------------------------------------------------------------------------------------------------------------------------------------------------------------------------------------------------------------------------------------------------------------------------------------------------------------------------------------------------------------------------------------------------------------------------------------------------------------------------------------------------------------------------------------------------------------------------------------------------------------------------------------------------------------------------------------------------------------------------------------------------------|
| Infections and infestations                    | Pneumocystis jiroveci pneumonia | 20      | Approximately 620 days after the patient's only islet transplantation, the patient was transferred to the transplant hospital after 3 days local hospitalization marked by progressive dyspnea, hypoxia, fever, and pulmonary infiltrates not responding to antibacterial therapy. BAL cytology revealed pneumocystis. The patient was not on Bactrim due to rash, and started treatment with clindamycin + primaquin + prednisone which was modified to bactrim + prednisone after desensitization. The patient had a supplemental O2 requirement (peak 10L NC) that slowly improved over ~10 days. Due to concerns about hyperkalemia, the patient was subsequently placed on atovaquone treatment almost two weeks into the 21 day treatment course. The patient was on insulin but was able to discontinue supplemental insulin at the completion of the prednisone course. The patient remained on atovaquone prophylaxis with uncomplicated recovery after completing pneumocystis therapy. The event was attributed to the immunosuppressive regimen. The event resolved without sequelae 1 month after onset. |
| Infections and infestations                    | Pyelonephritis                  | 27      | Approximately 540 days after the patient's only islet transplantation, the patient presented with acute dysuria and fever and was diagnosed with a urinary tract infection. Levofloxacin was given. After initial symptomatic improvement, the patient developed chills and flank pain and was admitted to the hospital. New cultures and imaging were negative. The antibiotic regimen was changed to cefepime and subsequently oral cefpodoxime for a 14 day course. The event was attributed to immunosuppressive therapy. The event resolved without sequelae.                                                                                                                                                                                                                                                                                                                                                                                                                                                                                                                                                    |
| Injury, poisoning and procedural complications | Drug toxicity                   | 41      | The patient presented with vomiting and elevated transaminases 6 days after transplant. The symptoms were attributed to sirolimus, due to an elevated (non-trough) sirolimus level. Dosing was adjusted during a three day hospitalization. The event was not attributed to the procedure or the islet product, but was attributed to the immunosuppressive regimen. The event resolved without sequelae three days after onset.                                                                                                                                                                                                                                                                                                                                                                                                                                                                                                                                                                                                                                                                                      |
| Injury, poisoning and procedural complications | Hepatic haematoma               | 11      | Slightly less than 2 months after a second islet transplant and 5 months after initial islet transplant, the patient was in a motor vehicle accident: the car the patient was driving was hit by another car on the driver's side. The patient did not have any loss of consciousness or hypoglycemia; the patient needed to be extracted from the car. Emergency department evaluation led to a radiographic diagnosis of subcapsular liver hematoma. The patient was hospitalized for observation for 2 days, was clinically stable, and was discharged without additional intervention. The event was not attributed to either the procedure/islet infusion and not attributed to immunosuppression/infection prophylaxis. The event resolved without sequelae three days after onset.                                                                                                                                                                                                                                                                                                                             |

SUPPLEMENTARY DATA

| <b>System Organ Class</b>                      | <b>Preferred Term</b>        | <b>Patient</b> | <b>Description</b>                                                                                                                                                                                                                                                                                                                                                                                                                                                                                                                                                                                                                                                                                                                                                                                                                                                                                                                                                                                                                                                                          |
|------------------------------------------------|------------------------------|----------------|---------------------------------------------------------------------------------------------------------------------------------------------------------------------------------------------------------------------------------------------------------------------------------------------------------------------------------------------------------------------------------------------------------------------------------------------------------------------------------------------------------------------------------------------------------------------------------------------------------------------------------------------------------------------------------------------------------------------------------------------------------------------------------------------------------------------------------------------------------------------------------------------------------------------------------------------------------------------------------------------------------------------------------------------------------------------------------------------|
| Injury, poisoning and procedural complications | Hip fracture                 | 28             | The patient tripped on a sticky floor and fell. X-rays disclosed hip fracture. The patient underwent surgical treatment with no postoperative complications. The event was not attributed to the procedure/islet infusion and not attributed to the immunosuppression/infection prophylaxis. The resolved without sequelae three days after onset.                                                                                                                                                                                                                                                                                                                                                                                                                                                                                                                                                                                                                                                                                                                                          |
| Injury, poisoning and procedural complications | Medication error             | 42             | A medication error led to administration of an incorrect, very high insulin dose via intravenous drip infusion (250 units per hour for approx 35 minutes) during hospitalization prior to transplant. The blood glucose dropped as low as 31. The patient received multiple ampules of D50; the episode was fully resolved more than 4 hours prior to transplant procedure. The event was not attributed to the procedure/islet infusion and not attributed to the immunosuppression. The event resolved without sequelae on the day of onset.                                                                                                                                                                                                                                                                                                                                                                                                                                                                                                                                              |
| Injury, poisoning and procedural complications | Post procedural complication | 26             | The patient received a second transplant which was performed percutaneously with ultrasound and fluoroscopic guidance, with gelfoam used to seal the catheter tract. The patient's hemoglobin was stable (11g/dL) until 9 days after the procedure, at which time the patient reported acute onset of severe pain and nausea and vomiting. A local emergency department provider prescribed outpatient antiemetics and narcotic analgesic after noting a hemoglobin of 9 and perihepatic fluid. Patient returned to the emergency department after another acute episode of pain. At that point, the abdomen was distended and tender, with hemoglobin now down to 5. Two units of packed red cells were given and a workup revealed a large pseudoaneurysm in the left hepatic artery distribution that was successfully treated with coil embolization. The patient's anemia and subcapsular hematoma slowly resolved. The event was attributed to the islet infusion procedure, and not attributed to the immunosuppression/infectious prophylaxis. The event resolved without sequelae. |
| Injury, poisoning and procedural complications | Post procedural complication | 37             | The patient received an initial transplant via percutaneous approach and complained of right upper quadrant pain 4 hours after the procedure. Heparin was discontinued and 2 units of packed red cells were transfused. Ultrasound imaging was interpreted as consistent with a hepatic hematoma. No other treatment was required. The hemoglobin returned to normal within 15 days of transplant. The event was attributed to the islet infusion procedure, and not attributed to the immunosuppression/infection prophylaxis. The event resolved without sequelae.                                                                                                                                                                                                                                                                                                                                                                                                                                                                                                                        |



SUPPLEMENTARY DATA

| <b>System Organ Class</b>                      | <b>Preferred Term</b>                  | <b>Patient</b> | <b>Description</b>                                                                                                                                                                                                                                                                                                                                                                                                                                                                                                                                                                                                                                                                                                                 |
|------------------------------------------------|----------------------------------------|----------------|------------------------------------------------------------------------------------------------------------------------------------------------------------------------------------------------------------------------------------------------------------------------------------------------------------------------------------------------------------------------------------------------------------------------------------------------------------------------------------------------------------------------------------------------------------------------------------------------------------------------------------------------------------------------------------------------------------------------------------|
| Injury, poisoning and procedural complications | Post procedural haemorrhage            | 46             | On the day after receiving an initial transplant via percutaneous approach, the patient complained of severe upper abdominal pain. Ultrasound disclosed periportal and pelvic fluid collections, accompanied by a serial decrease in hemoglobin. On the next day, laparoscopy was performed with evacuation of clot and a collection of bloody fluid, and hemostasis of the liver surface was achieved. Two units of packed red cells were transfused. The event was attributed to the islet infusion procedure, and not attributed to the immunosuppression/infection prophylaxis. The event resolved without sequelae.                                                                                                           |
| Injury, poisoning and procedural complications | Post procedural haemorrhage            | 30             | This event occurred during a second islet transplant approximately 4 months after initial islet transplant. Transplant access was performed in interventional radiology with hemorrhage noted upon withdrawal of the intraportal catheter, despite use of the gelfoam pledget. The transplant surgeons performed emergent exploratory laparotomy with coagulation of the puncture site and evacuation of 1000 ml of hemoperitoneum. Protocol-scheduled heparin was not started; 3 units of packed red cells and 1 unit of fresh frozen plasma were administered. The event was attributed to the islet infusion procedure, and not attributed to the immunosuppression/infection prophylaxis. The event resolved without sequelae. |
| Investigations                                 | Immunosuppressant drug level increased | 4              | The patient had elevated tacrolimus and sirolimus levels 4 days after transplant, without symptoms. Both drugs were held and doses subsequently adjusted. The event was not attributed to the islet infusion procedure, but was attributed to the immunosuppression treatment. The event resolved without sequelae.                                                                                                                                                                                                                                                                                                                                                                                                                |
| Metabolism and nutrition disorders             | Hypoglycaemic unconsciousness          | 43             | Approximately 11 months after the patient's only islet transplantation, this patient remained on insulin pump therapy. The patient awoke with no clearly recalled symptoms, but checked a BG, which was 49. The patient ate cookies and then has no clear recollection of events until she awakened on the kitchen floor. The patient called a friend who arrived to assist several minutes later. The patient was advised to adjust/lower the insulin boluses. The event was not attributed to the islet infusion procedure, and not attributed to immunosuppression. The event resolved without sequelae.                                                                                                                        |

SUPPLEMENTARY DATA

| System Organ Class                 | Preferred Term                | Patient | Description                                                                                                                                                                                                                                                                                                                                                                                                                                                                                                                                                                                                                                                                       |
|------------------------------------|-------------------------------|---------|-----------------------------------------------------------------------------------------------------------------------------------------------------------------------------------------------------------------------------------------------------------------------------------------------------------------------------------------------------------------------------------------------------------------------------------------------------------------------------------------------------------------------------------------------------------------------------------------------------------------------------------------------------------------------------------|
| Metabolism and nutrition disorders | Hypoglycaemic unconsciousness | 43      | Approximately 16 months after the patient's only islet transplant, the patient experienced a hypoglycemic episode while driving into work. Emergency medical personnel tested the Blood sugar with a result of 10 g/dl. They administered glucagon and IV dextrose. Glucose transiently improved, and then hypoglycemia recurred (BG=22) so the patient received glucagon and IV glucose, and was transported to the hospital. The patient was advised to adjust/lower insulin therapy. The event was not attributed to the islet infusion procedure, and not attributed to immunosuppression. The event resolved without sequelae.                                               |
| Nervous system disorders           | Dementia                      | 24      | This event occurred approximately 19 months and 23 months after the patient's islet transplant procedures. The patient had a pre-transplant history of mild cognitive deficits that slowly progressed, with the patient being transferred to an assisted living facility due to inability to perform activities of daily living. Frontotemporal dementia was diagnosed. The event was not attributed to the islet infusion procedure, and not attributed to the immunosuppression/infection prophylaxis. The event was closed as resolved with continuing, progressive symptoms.                                                                                                  |
| Psychiatric disorders              | Conversion disorder           | 27      | The patient was admitted to hospital approximately 9 months after the islet transplant procedure, following a suspected seizure at the workplace; tacrolimus was held due to suspicion of PRES. Workup including continuous EEG monitoring was considered to be suggestive of pseudoseizures, especially in light of multiple recent social stressors. The patient was subsequently discharged with no subsequent seizure/pseudoseizure episodes on outpatient follow-up. The event was not attributed to the islet infusion procedure, and not attributed to the immunosuppression/infection prophylaxis. The event was closed as resolved without sequelae 10 days after onset. |
| Renal and urinary disorders        | Renal failure acute           | 40      | Three months after the patient's initial islet transplantation, there was a progressive increase in the patient's serum creatinine over a three week period, to peak of 3.0 mg/dL, 3 times the pre-transplant value. The patient received outpatient IV hydration, with progressive improvement in creatinine, which stabilized at 1.4-1.5 mg/dL. The event was not attributed to the islet infusion procedure, but was attributed to immunosuppression. The event resolved without sequelae 10 weeks after the onset.                                                                                                                                                            |
